# Supplementary material for: Phylogenomics, plastome degradation and mycoheterotrophy evolution of Neottieae (Orchidaceae), with emphasis on the systematic position and Loess Plateau-Changbai Mountains disjunction of Diplandrorchis
Source: PubMed Central journal article supplement (PMC9624021; doi:10.1186/s12870-022-03906-0), 2022-11-01

---

## Additional file 2

**Fig. S1.** Evolutionary inference of nutrition types for Neottieae. Numbers in bold near branches indicate the node number, as referred to Fig. 3. Large pie charts show the relative probabilities of alternative ancestral states obtained by BayesTraits.

**Fig. S2.** Ancestral range reconstruction for Neottieae using BioGeoBEARS under the statistical DEC model. Numbers in bold near branches indicate the node number, as referred to Fig. 3. Large pie charts show the relative probabilities of alternative ancestral distributions. Areas with probabilities below 5% are hidden and lumped together in black.

- Autotrophy
- ◐ Mixotrophy
- Mycoheterotrophy

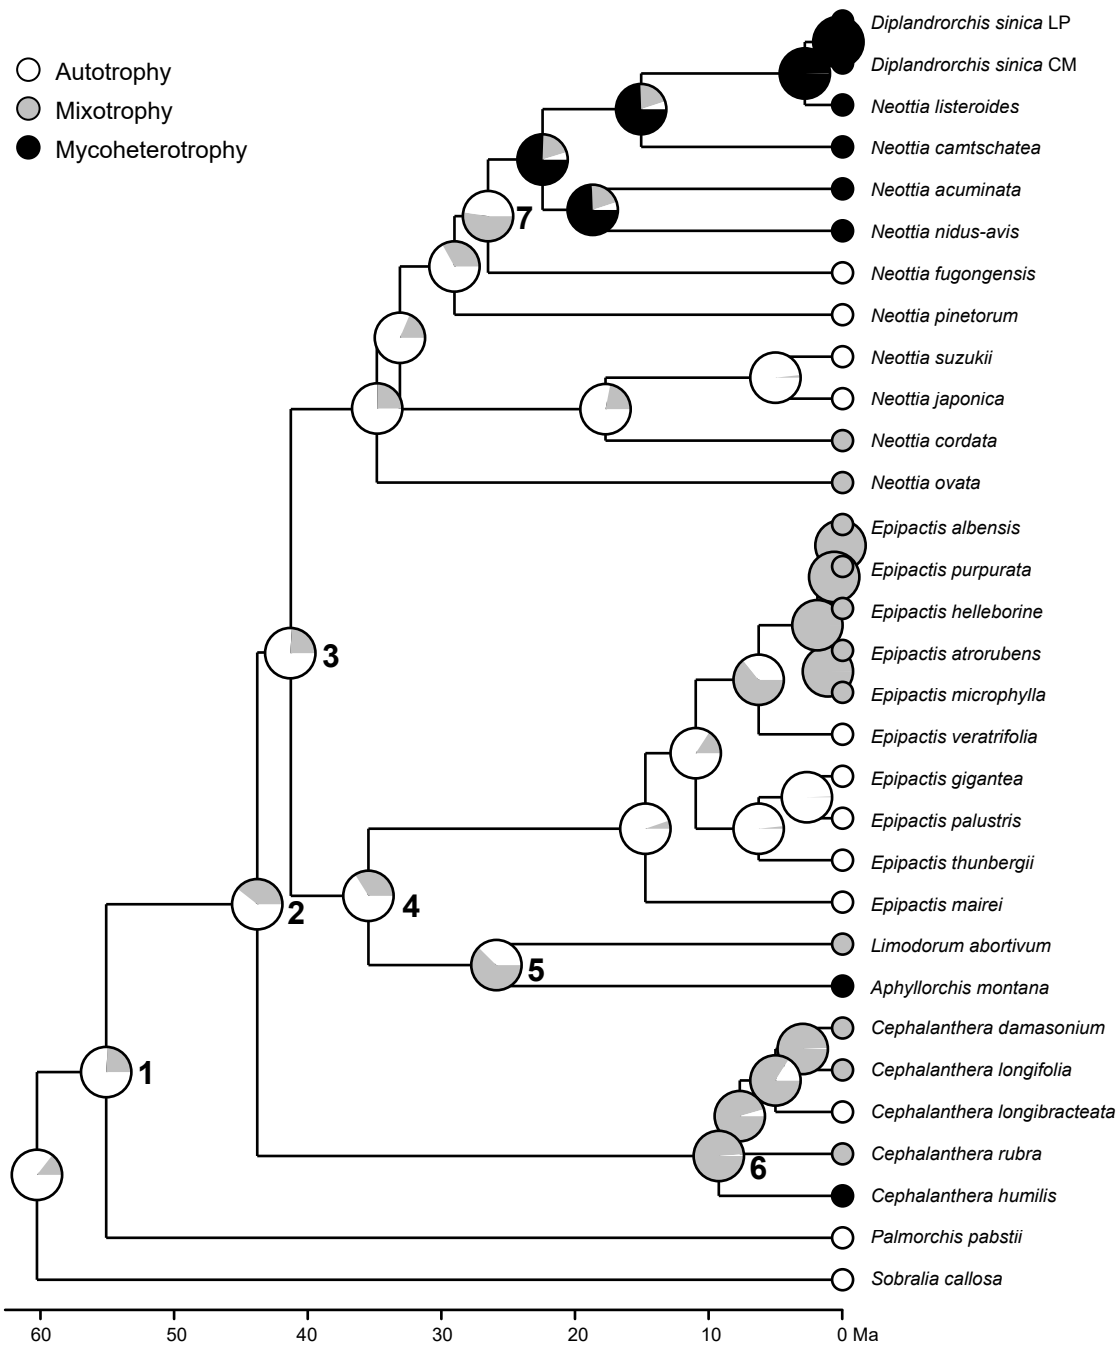

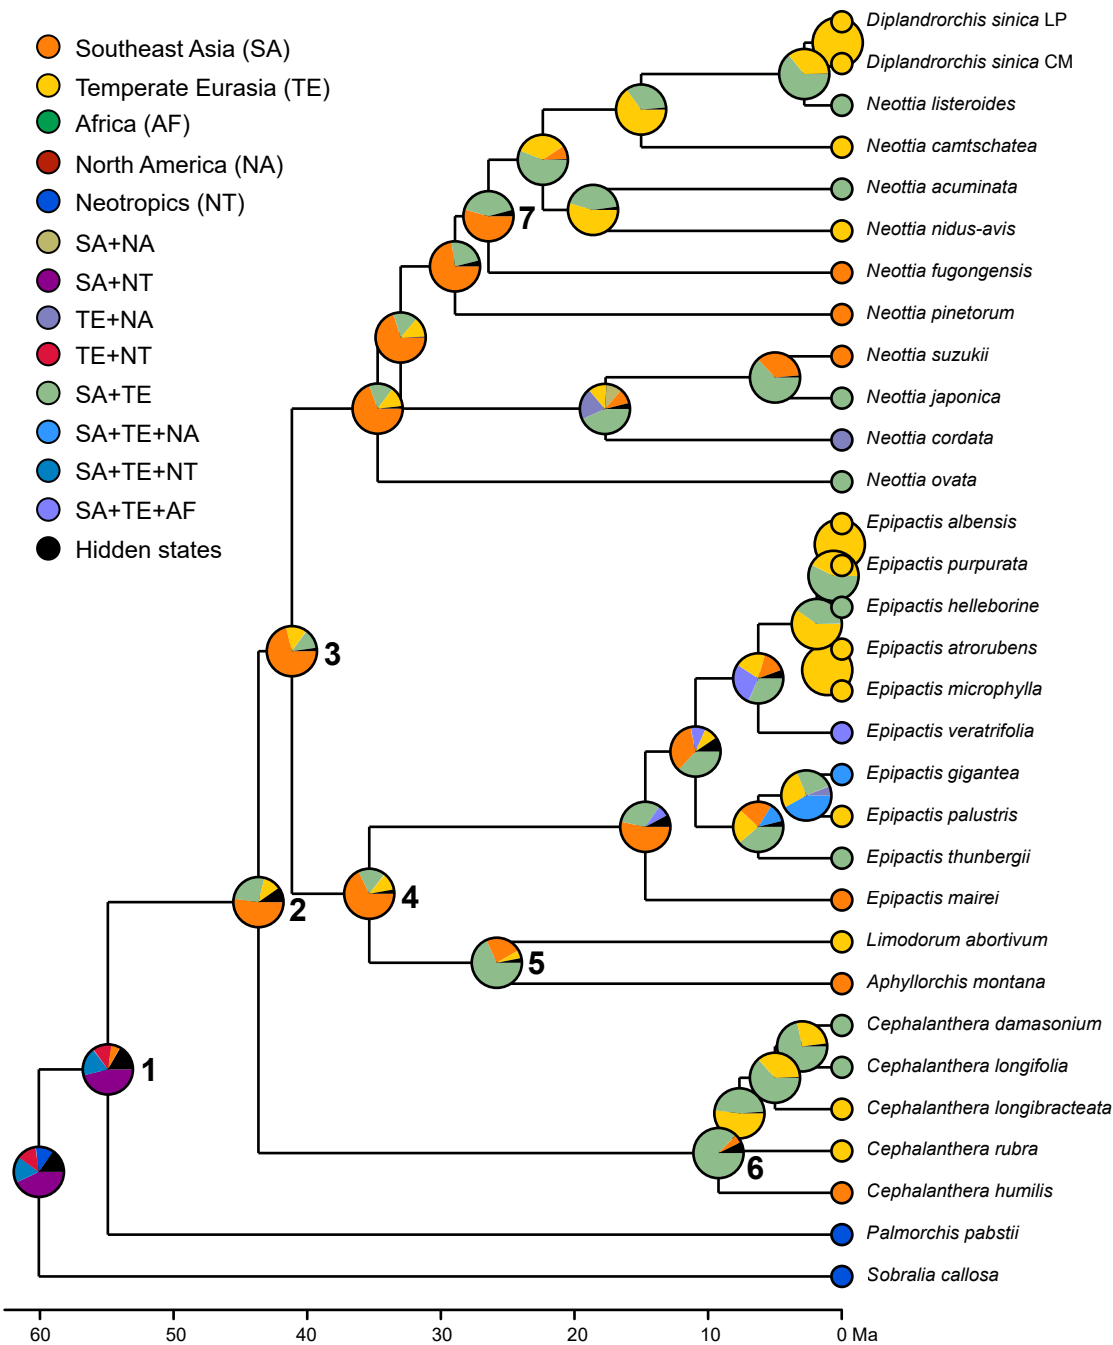

Supplement: 12870_2022_3906_MOESM2_ESM.pdf [file 12870_2022_3906_MOESM2_ESM.pdf]
